# Supplementary material
Source: MDPI journal article supplement (https://www.mdpi.com/2571-8789/4/4/66)
Supplement: s1 [file s1]

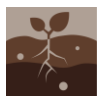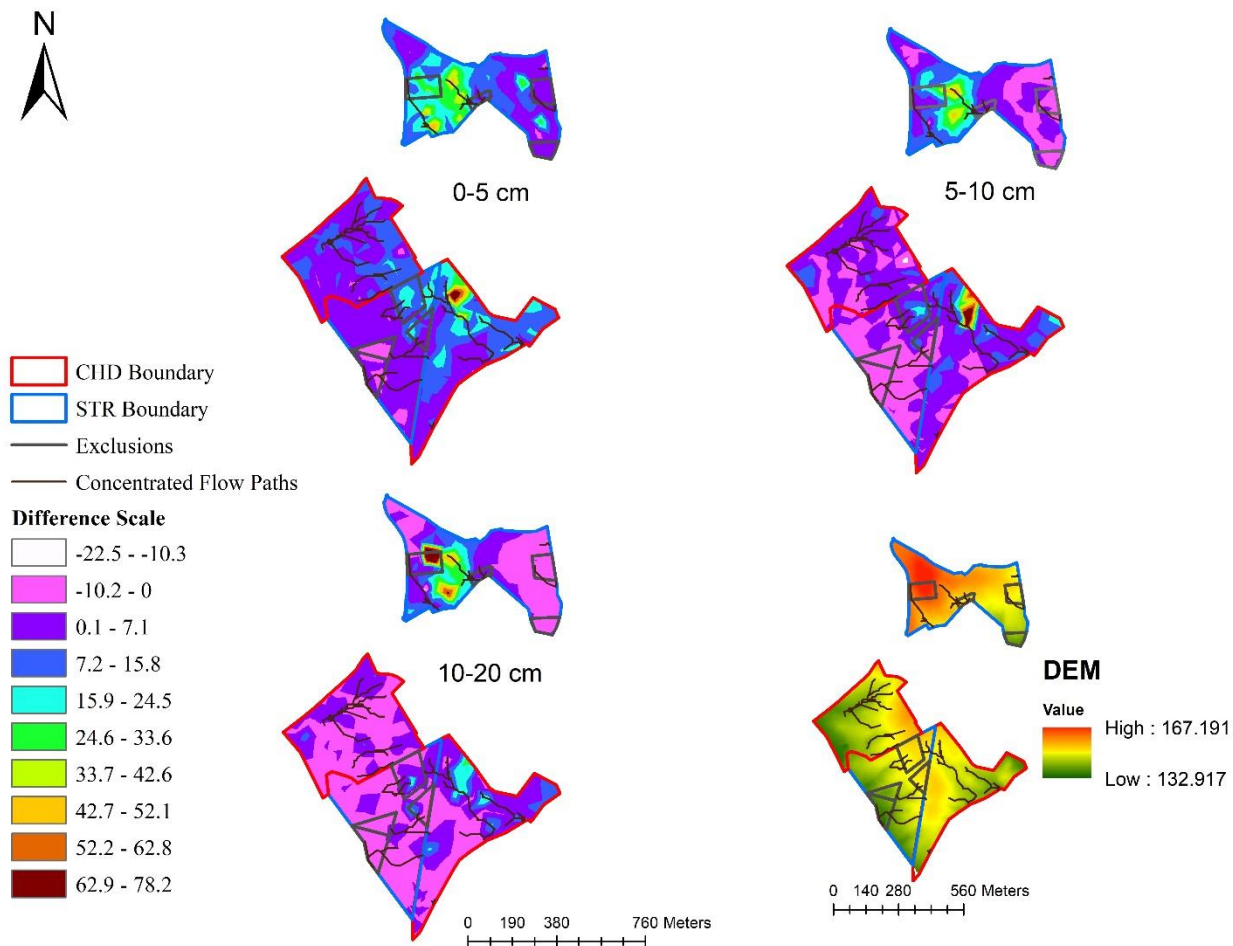

**Figure S1.** Spatial distribution of change in Mehlich-1 phosphorus (change  $\text{mg kg}^{-1}$  = 2018 raster – 2015 raster) at Eatonton location.

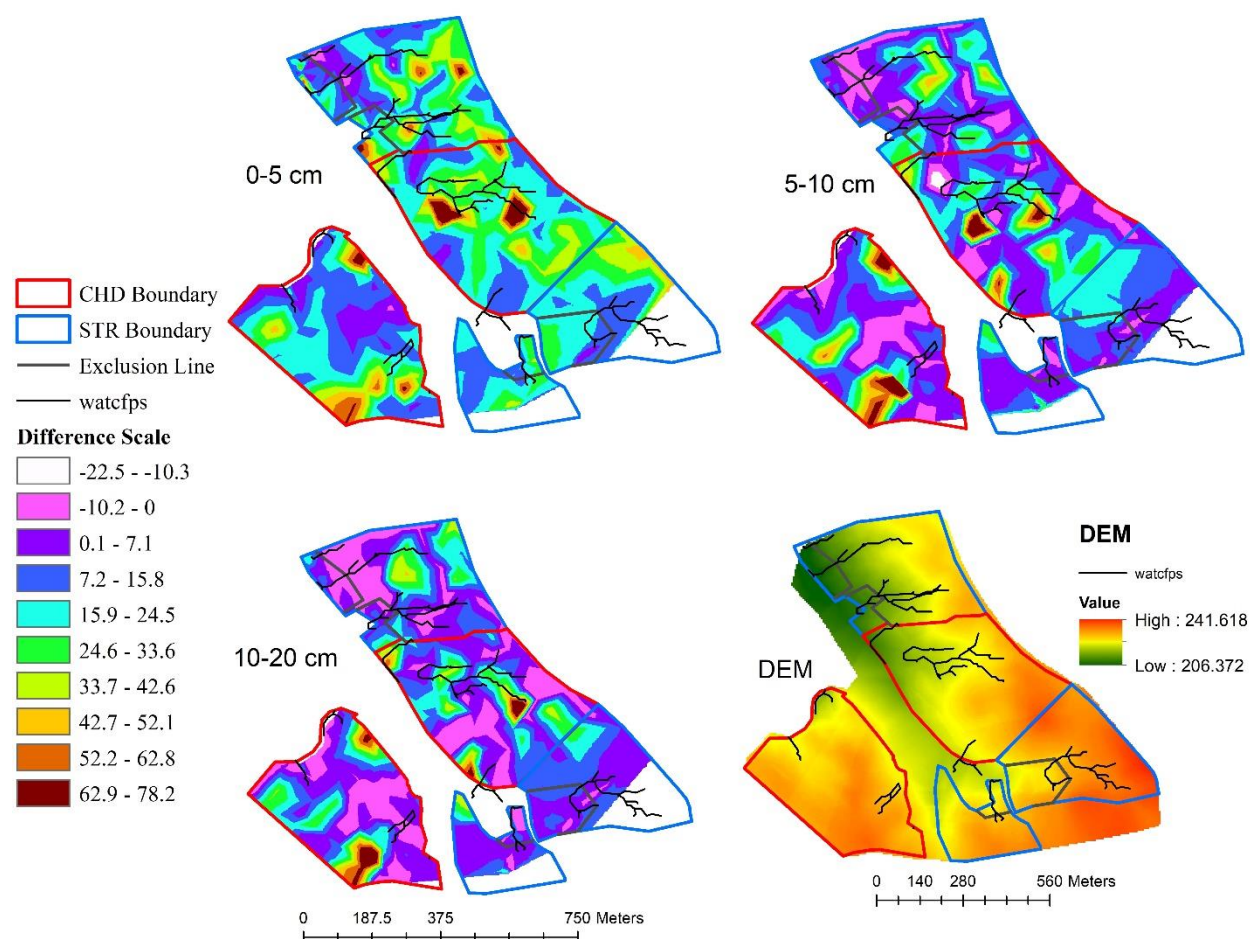

**Figure S2.** Difference and DEM of Watkinsville pastures: Spatial distribution of change in Mehlich-1 phosphorus (change  $\text{mgkg}^{-1}$  = 2018 raster – 2015 raster) at Watkinsville location.

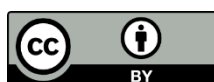

© 2020 by the authors. Licensee MDPI, Basel, Switzerland. This article is an open access article distributed under the terms and conditions of the Creative Commons Attribution (CC BY) license (<http://creativecommons.org/licenses/by/4.0/>).
